# Supplementary material
Source: Springer Nature journal article supplement (https://www.springermedizin.de/resource/supplementary/12914_2011_169_MOESM3_ESM.pdf/9536918)

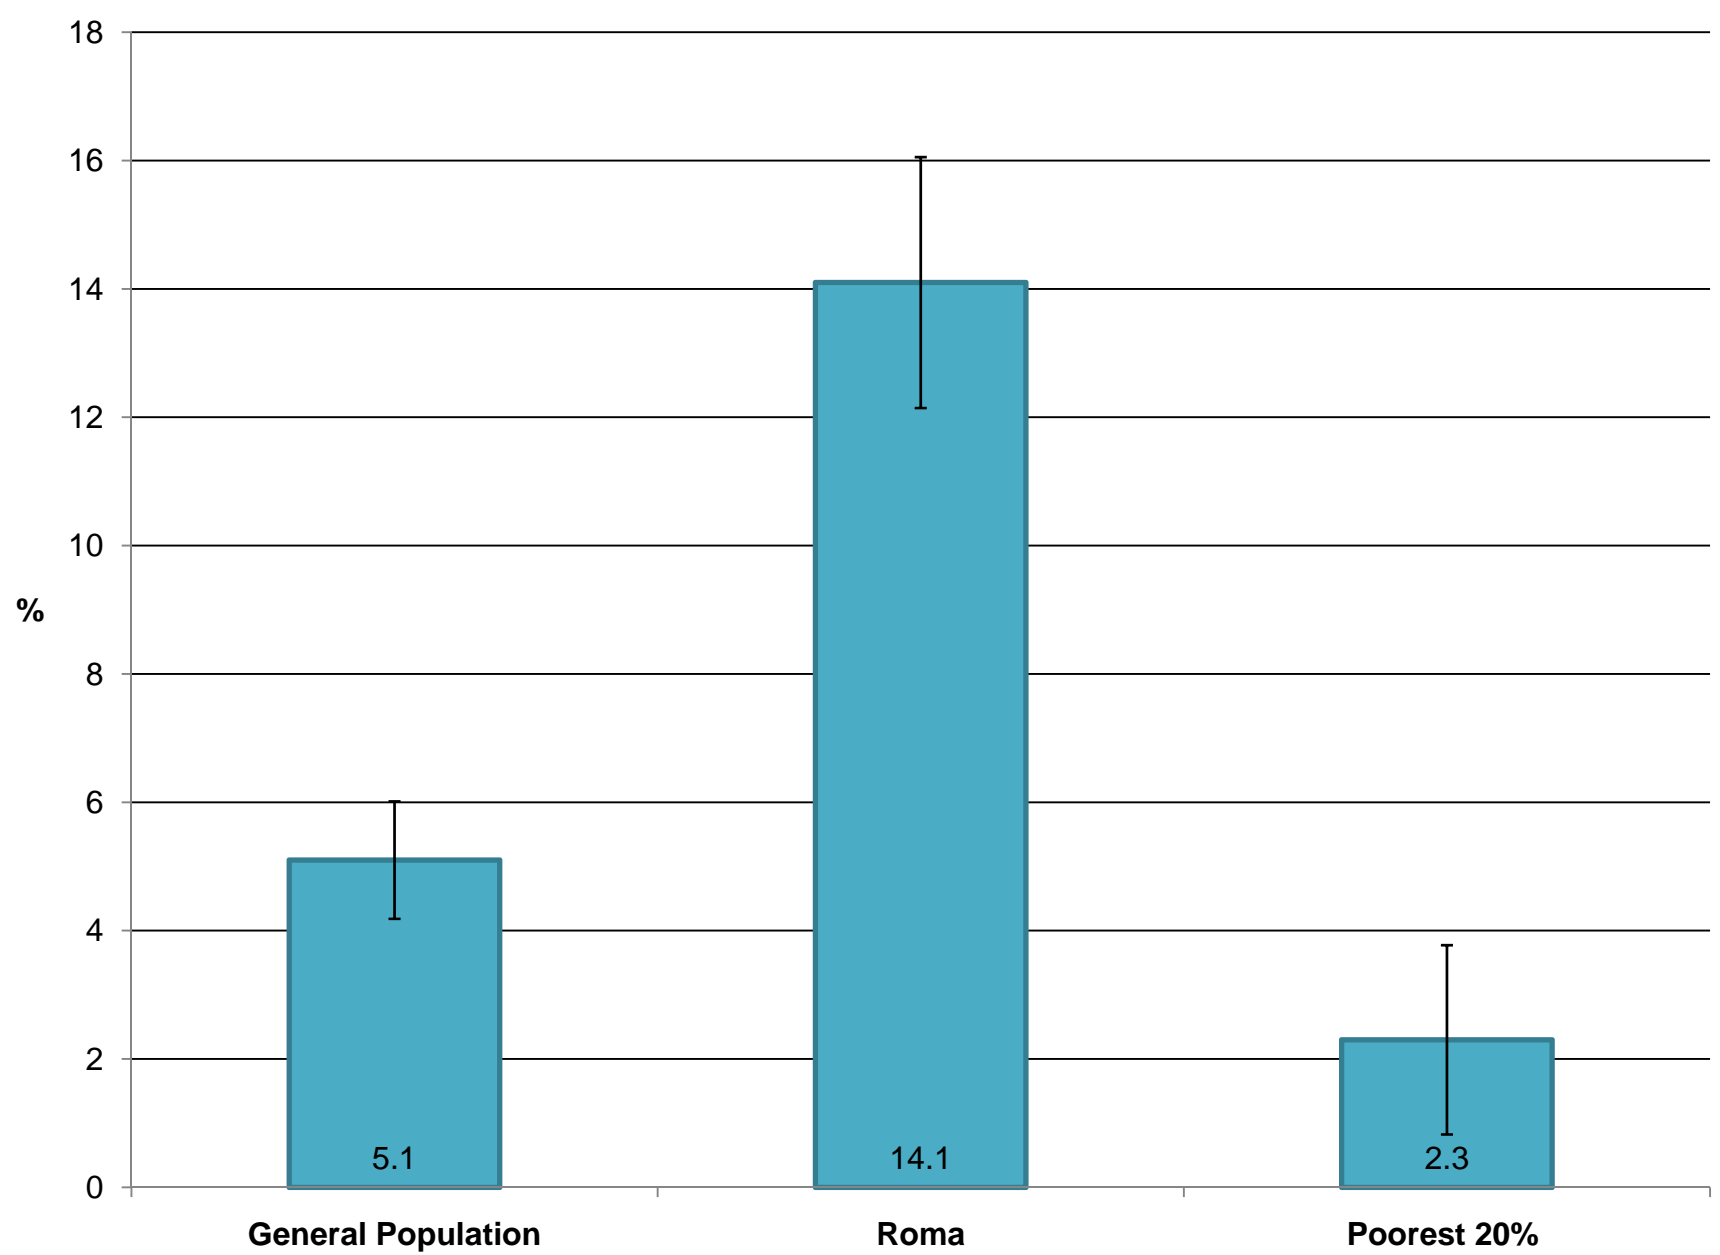

Supplement: MOESM3 [file 9536918]
